# Supplementary material for: An alternative polysaccharide uptake mechanism of marine bacteria
Source: PubMed Central journal article supplement (PMC5520146; doi:10.1038/ismej.2017.26), 2017-03-21
Supplement: ismej201726x5.pdf [file ismej201726x5.pdf]

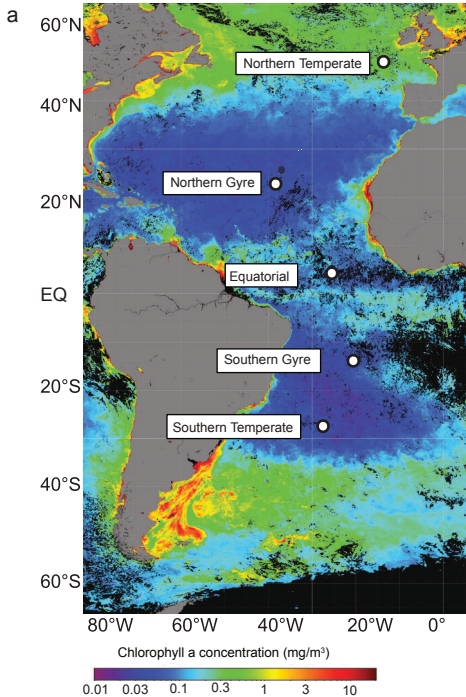

**b**

| Site               | Latitude | Longitude |
|--------------------|----------|-----------|
| Northern Temperate | 47°52N   | 17°16W    |
| Northern Gyre      | 22°04N   | 39°47W    |
| Equatorial         | 2°55N    | 25°39W    |
| Southern Gyre      | 11°37S   | 25°10W    |
| Southern Temperate | 26°57S   | 25°00W    |
