# Supplementary material for: An alternative polysaccharide uptake mechanism of marine bacteria
Source: PubMed Central journal article supplement (PMC5520146; doi:10.1038/ismej.2017.26), 2017-03-21

a) *G. forsetii* culture - No FLA laminarin

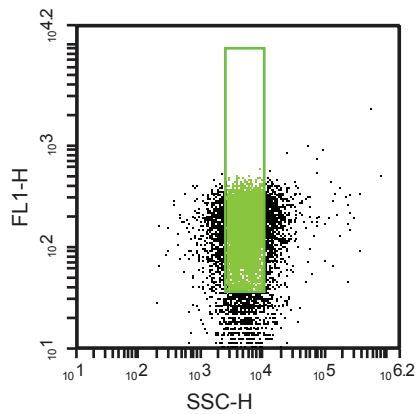

b) *G. forsetii* culture- 35  $\mu$ M FLA laminarin after 5min

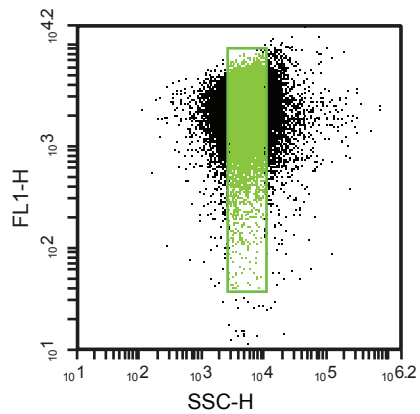

c) *G. forsetii* culture 1  $\mu$ M FLA laminarin after 5min

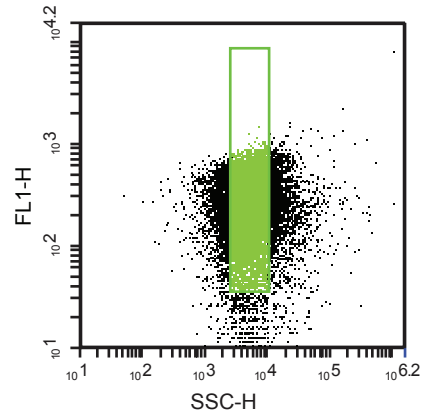

d) 5 Min

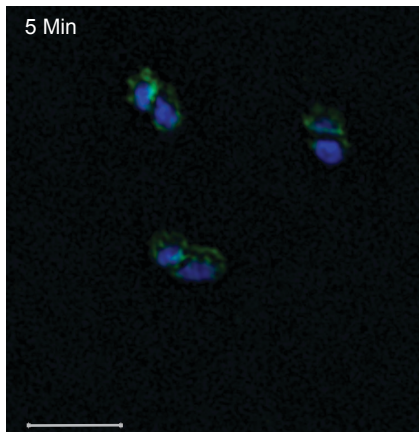

e) 100 Min

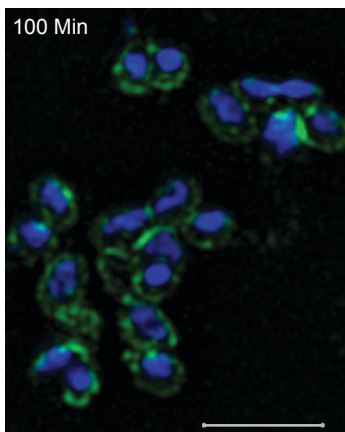

Supplement: ismej201726x7.pdf [file ismej201726x7.pdf]
