# Supplementary material for: An alternative polysaccharide uptake mechanism of marine bacteria
Source: PubMed Central journal article supplement (PMC5520146; doi:10.1038/ismej.2017.26), 2017-03-21

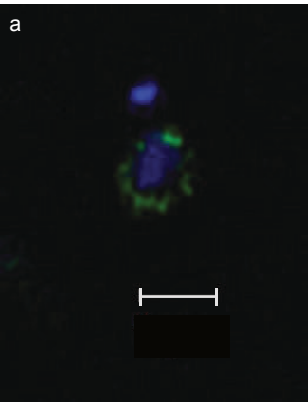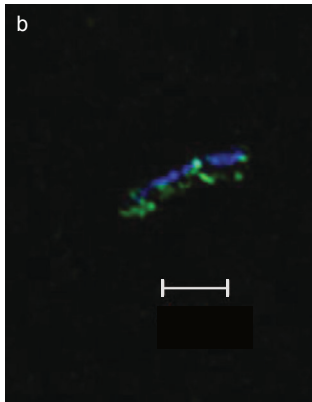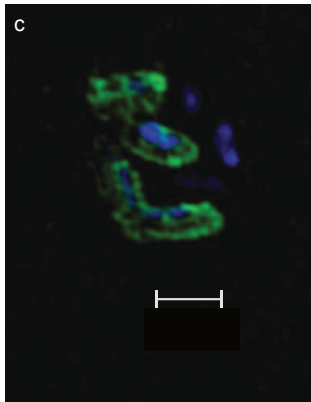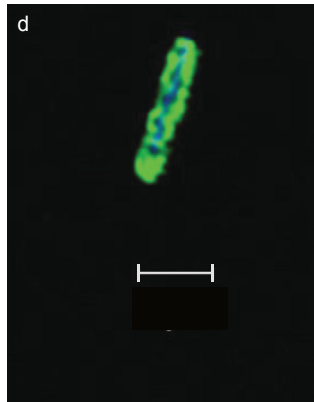

Supplement: ismej201726x8.pdf [file ismej201726x8.pdf]
