# Supplementary material for: An alternative polysaccharide uptake mechanism of marine bacteria
Source: PubMed Central journal article supplement (PMC5520146; doi:10.1038/ismej.2017.26), 2017-03-21

DAPI (365 nm laser, 30ms exposure time)

Substrate (470 nm laser, 300ms exposure time)

Laminarin incubation

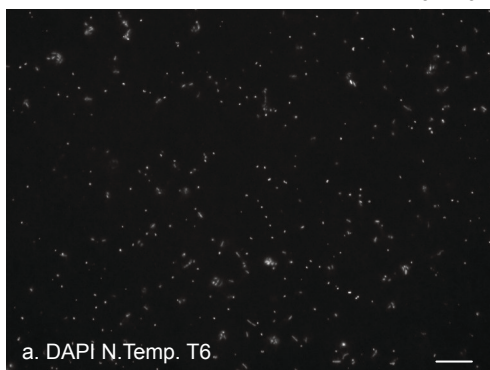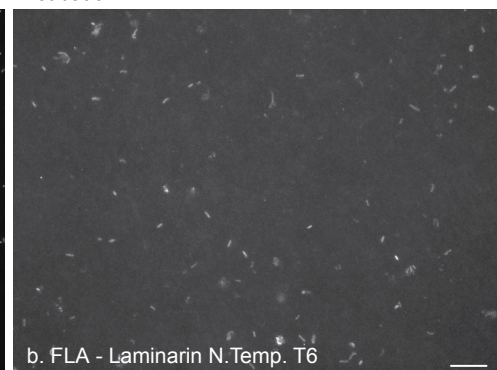

Treatment control

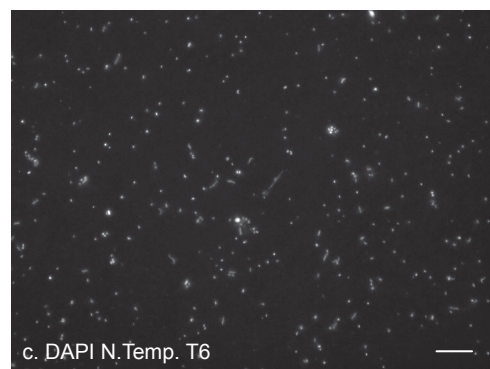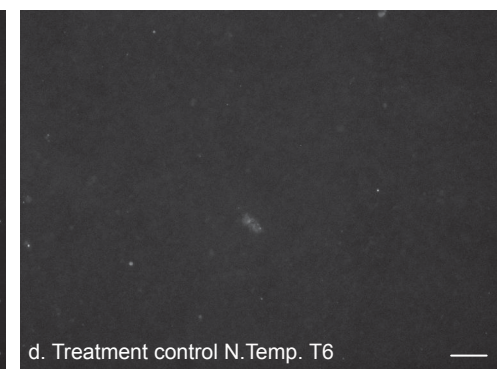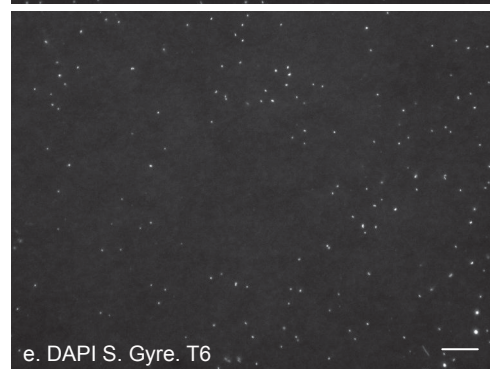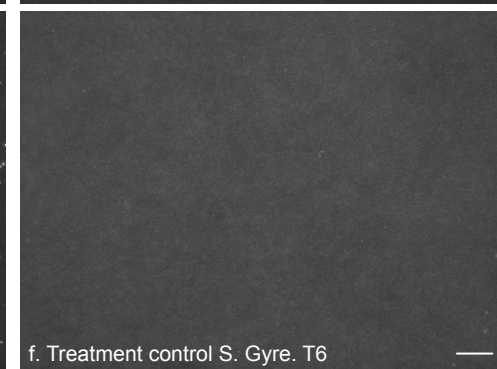

DAPI (365 nm laser, 20ms exposure time)

Substrate (470 nm laser, 200ms exposure time)

*Gramella forsetii* FA fixed control

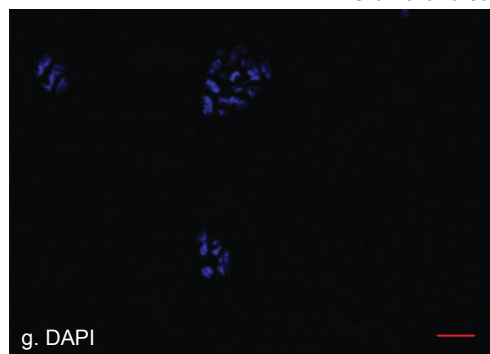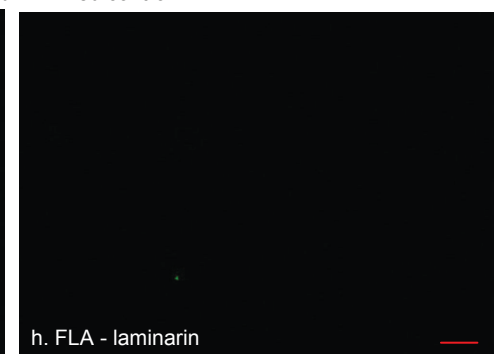

Supplement: ismej201726x10.pdf [file ismej201726x10.pdf]
